# Supplementary material
Source: ML conference proceedings conference paper supplement (https://proceedings.neurips.cc/paper_files/paper/2022/hash/89b89c04f55ea7c7ca989992bb6a98c0-Abstract.html)
Supplement: Supplementary file 1 [file 89b89c04f55ea7c7ca989992bb6a98c0-Supplemental-Conference.pdf]

## Appendix

This appendix contains the remaining proofs, additional simulations, some background on the RKHS and the connections between different settings in the literature on kernel ridge regression.

### A Verifying reproducing property

To see the reproducing property of the kernel  $\tilde{\mathbb{K}}$ , defined in (5), for the space  $\tilde{\mathbb{H}}$ , note that for any  $f = \sum_{\ell} \alpha_{\ell} \psi_{\ell} \in \tilde{\mathbb{H}}$ , we have

$$\langle f, \tilde{\mathbb{K}}(\cdot, y) \rangle_{\tilde{\mathbb{H}}} = \sum_{\ell=1}^r \sum_{k=1}^r \alpha_{\ell} \mu_k \psi_k(y) \langle \psi_{\ell}, \psi_k \rangle_{\tilde{\mathbb{H}}} = \sum_{k=1}^r \alpha_k \psi_k(y) = f(y).$$

### B Remaining proofs

*Proof of Proposition 1.* We write  $y = (y_1, \dots, y_n)$  and  $\varepsilon = (\varepsilon_1, \dots, \varepsilon_n)$ . Then, the model can be compactly written as  $y = \sqrt{n} S_{\mathbf{x}}(f^*) + \varepsilon$ . Let  $\tilde{y} = y/\sqrt{n}$  and  $\tilde{\varepsilon} = \varepsilon/\sqrt{n}$  so that

$$\tilde{y} = S_{\mathbf{x}}(f^*) + \tilde{\varepsilon}.$$

By the representer theorem, a general TKRR solution is  $\tilde{f}_{r,\lambda} = \tilde{S}_{\mathbf{x}}^*(\tilde{\omega})$  where  $\tilde{\omega}$  is a solution of

$$\min_{\omega \in \mathbb{R}^n} \frac{1}{n} \|y - \sqrt{n} \tilde{K} \omega\|^2 + \lambda \omega^T \tilde{K} \omega. \quad (18)$$

The first-order optimality condition gives  $\tilde{K}[(\tilde{K} \tilde{\omega} - \tilde{y}) + \lambda \tilde{\omega}] = 0$ . Let us write  $K = U \Lambda U^T$  for the eigen-decomposition of the full kernel matrix, where  $\Lambda = \text{diag}(\mu_1, \dots, \mu_n)$  and  $U$  has columns  $u_1, \dots, u_n$ . Let  $U_1 = [u_1 \mid u_2 \mid \dots \mid u_r] \in \mathbb{R}^{n \times r}$ ,  $U_2 = [u_{r+1} \mid \dots \mid u_n] \in \mathbb{R}^{n \times (n-r)}$  and  $\Lambda_1 = \text{diag}(\mu_1, \dots, \mu_r) \in \mathbb{R}^{r \times r}$ . Then,  $\tilde{K} = U_1 \Lambda_1 U_1^T$  and  $\tilde{\omega} = U_1 \alpha + U_2 \beta$  for some vectors  $\alpha$  and  $\beta$ . Substituting into the first-order condition and noting  $U_1^T U_1 = I_r$  and  $U_1^T U_2 = 0$ , we have

$$U_1 \Lambda_1 [(\Lambda_1 \alpha - U_1^T \tilde{y}) + \lambda \alpha] = 0.$$

Let  $\xi_{(1)} = U_1^T \tilde{y}$ . Multiplying both sides of the above by  $\Lambda_1^{-1} U_1^T$ , we obtain  $(\Lambda_1 \alpha - \xi_{(1)}) + \lambda \alpha = 0$ . Letting  $A_{\lambda} = \Lambda_1 + \lambda I_r$ , we have  $\alpha = A_{\lambda}^{-1} \xi_{(1)}$ . Thus all the solutions  $\tilde{\omega}$  of (18) are of the form

$$\tilde{\omega} = U_1 A_{\lambda}^{-1} \xi_{(1)} + U_2 \beta \quad (19)$$

for an arbitrary  $\beta \in \mathbb{R}^{n \times (n-r)}$ .

Next, combining (5) and (7), we have for any  $\omega \in \mathbb{R}^n$ ,

$$\tilde{S}_{\mathbf{x}}(\omega) = \frac{1}{\sqrt{n}} \sum_{j=1}^n \omega_j \sum_{k=1}^r \mu_k \psi_k \psi_k(x_j) = \sum_{j=1}^n \omega_j \sum_{k=1}^r \mu_k \psi_k u_{kj} = \sum_{k=1}^r (u_k^T \omega) \mu_k \psi_k. \quad (20)$$

Since  $u_k^T U_2 \beta = 0$  for all  $k = 1, \dots, r$ , it follows that  $\tilde{f}_{r,\lambda} = \tilde{S}_{\mathbf{x}}^*(\tilde{\omega})$  is the same regardless of the value of  $\beta$ , proving the uniqueness. In fact, noting that  $u_k^T \tilde{\omega} = (\mu_k + \lambda)^{-1} u_k^T \tilde{y}$  for all  $k \in [r]$ ,

$$\tilde{f}_{r,\lambda} = \sum_{k=1}^r \frac{\mu_k}{\mu_k + \lambda} (u_k^T \tilde{y}) \psi_k. \quad (21)$$

For future reference,  $\tilde{f}_{r,\lambda} = \tilde{S}_{\mathbf{x}}^*(\tilde{\omega})$  implies  $\tilde{f}_{r,\lambda}(x_i) = \frac{1}{\sqrt{n}} \sum_{j=1}^n \tilde{\omega}_j \tilde{\mathbb{K}}(x_i, x_j) = \sqrt{n} [\tilde{K} \tilde{\omega}]_i$ , hence

$$S_{\mathbf{x}}(\tilde{f}_{r,\lambda}) = \tilde{K} \tilde{\omega} = (U_1 \Lambda_1 U_1^T) (U_1 A_{\lambda}^{-1} \xi_{(1)} + U_2 \beta) = U_1 \Lambda_1 A_{\lambda}^{-1} \xi_{(1)}. \quad (22)$$

The proof is complete.  $\square$

*Proof of Theorem 1.* Using the previous notation and recalling that  $\xi^* = U^T S_{\mathbf{x}}(f^*)$ , we have  $\xi := U^T \tilde{y} = \xi^* + \mathbf{z}$  and  $\mathbf{z} := U^T \tilde{\varepsilon}$ . Writing  $\xi = U^T \tilde{y} = (\xi_{(1)}, U_2^T \tilde{y})$ , we can rewrite (22) as  $S_{\mathbf{x}}(\tilde{f}_{r,\lambda}) = U\Gamma_{\lambda}\xi$ . It follows that

$$\begin{aligned}\|\tilde{f}_{r,\lambda} - f^*\|_n^2 &= \|S_{\mathbf{x}}(\tilde{f}_{r,\lambda}) - S_{\mathbf{x}}(f^*)\|_2^2 \\ &= \|U\Gamma_{\lambda}\xi - U\xi^*\|_2^2 \\ &= \|\Gamma_{\lambda}\xi - \xi^*\|_2^2 = \|(\Gamma_{\lambda} - I_n)\xi^* + \Gamma_{\lambda}\mathbf{z}\|_2^2.\end{aligned}$$

Expanding and using  $\mathbb{E}[\mathbf{z}] = 0$ , we get

$$\mathbb{E}\|\tilde{f}_{r,\lambda} - f^*\|_n^2 = \|(I_n - \Gamma_{\lambda})\xi^*\|_2^2 + \text{tr}(\Gamma_{\lambda}^2 \mathbb{E}[\mathbf{z}\mathbf{z}^T]).$$

Noting that  $\mathbb{E}[\mathbf{z}\mathbf{z}^T] = \text{cov}(\mathbf{z}) = U^T \text{cov}(\tilde{\varepsilon})U = \frac{\sigma^2}{n}U^T U = \frac{\sigma^2}{n}I_n$  gives

$$\mathbb{E}\|\tilde{f}_{r,\lambda} - f^*\|_n^2 = \|(I_n - \Gamma_{\lambda})\xi^*\|_2^2 + \frac{\sigma^2}{n} \text{tr}(\Gamma_{\lambda}^2)$$

which is the desired result. The expression (10) is obtained by writing  $\sum_{i=r+1}^n (\xi_i^*)^2 = \|\xi^*\|_2^2 - \sum_{i=1}^r (\xi_i^*)^2$  and noting that  $\|f\|_n = \|\xi^*\|_2$ .  $\square$

*Proof of Proposition 2.* The expression for  $\overline{\text{MSE}}$  follows by taking the expectation of both sides of (10) and noting that  $\mathbb{E}(\xi_i^*)^2 = 1/b$  when nonzero and  $\mathbb{E}\|f^*\|_n^2 = 1$ .

For part (a), first we note that  $\overline{\text{MSE}}$  is increasing in intervals  $[1, \ell]$  and  $[\ell + b, n]$ . This is immediate from the expression, since in both cases, the middle term in (12) remains constant as a function of  $r$ , while the the estimation error (the third term) contributes positive terms to the  $\overline{\text{MSE}}$  when increasing  $r$ . For the middle interval  $[\ell, \ell + b]$ , we consider the two intervals  $[\ell, j^*] = [\ell, j^* - 1]$  and  $[j^*, \ell + b]$  separately.

Assume first that  $j^* \in [\ell + 1, \ell + b]$ . Since  $i \mapsto \mu_i$  is decreasing, we have

$$\begin{aligned}1 + \frac{2\lambda}{\mu_i} &< \frac{\sigma^2}{n}b \quad \text{for } i \in [\ell + 1, j^* - 1], \\ 1 + \frac{2\lambda}{\mu_i} &\leq \frac{\sigma^2}{n}b \quad \text{for } i = j^*, \\ 1 + \frac{2\lambda}{\mu_i} &> \frac{\sigma^2}{n}b \quad \text{for } i \in [j^* + 1, \ell + b].\end{aligned}\tag{23}$$

The first two lines above follow since  $i \mapsto \mu_i$  is an strictly decreasing sequence by the distinctness of  $\{\mu_i\}$ , hence the inequality can potentially turn into an equality only at the endpoint  $i = j^*$ . The third line, (23), follows by the maximality of  $j^*$ . Inequality (23) is equivalent to  $\frac{1}{b}a_i(\lambda) > \frac{\sigma^2}{n}\mu_i^2$  showing that the combined contribution to the  $\overline{\text{MSE}}$  by the  $i$ th terms of the two sums in (12) is negative for  $i \in [j^* + 1, \ell + b]$ , hence the  $\overline{\text{MSE}}$  is decreasing on  $[j^*, \ell + b]$ . Similarly, the first inequality shows that the combined contribution by the  $i$ th terms of the two sums in (12) is positive for  $i \in [\ell + 1, j^* - 1]$ , hence the  $\overline{\text{MSE}}$  is increasing in  $[\ell, j^* - 1]$ . This completes the proof of part (a) when  $j^* \in [\ell + 1, \ell + b]$ . Note that in this case, the  $\overline{\text{MSE}}$  is possibly flat only on  $[j^* - 1, j^*]$ . When  $j^* = \ell + b$ , the assertion about the interval  $[j^*, \ell + b]$  is vacuous. When,  $j^* = \ell$ , by definition, inequality (23) holds for all  $i \in [\ell + 1, \ell + b]$ , hence the  $\overline{\text{MSE}}$  is decreasing in  $[\ell, \ell + b]$  by the previous argument. The proof of part (a) is complete.

For part (b), we note that the variable term of the  $\overline{\text{MSE}}$  for  $\ell \in [0, r - b]$  is

$$\frac{1}{b} \sum_{i=\ell+1}^{\ell+b} \frac{-a_i(\lambda)}{(\mu_i + \lambda)^2} = \frac{1}{b} \sum_{i=\ell+1}^{\ell+b} \frac{\lambda^2}{(\mu_i + \lambda)^2} - 1.\tag{24}$$

Since  $i \mapsto \frac{\lambda^2}{(\mu_i + \lambda)^2}$  is an increasing function, summing it over a sliding window of length  $b$  starting at  $\ell + 1$ , produces larger values as  $\ell$  increases.

For part (c), the variable term of  $\overline{\text{MSE}}$  is again (24) for  $b \in [1, r - \ell]$ . The variable part is the average of the sequence  $i \mapsto \frac{\lambda^2}{(\mu_i + \lambda)^2}$  over a window of length  $b$ . Increasing the window length then increases the average since the sequence is increasing.  $\square$

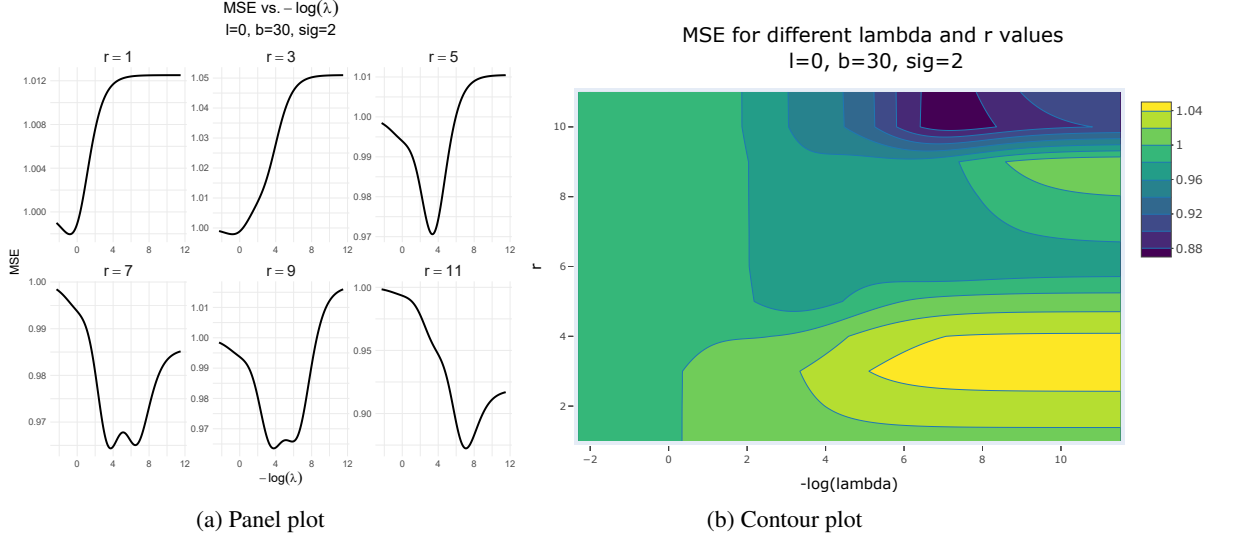

Figure 3: Multiple-descent and phase transition of  $\lambda$ -regularization curve: (a) Expected MSE as a function of  $-\log(\lambda)$  for different values of  $r$ , and (b) overall contour plot of expected MSE for  $r$  vs.  $-\log(\lambda)$ .

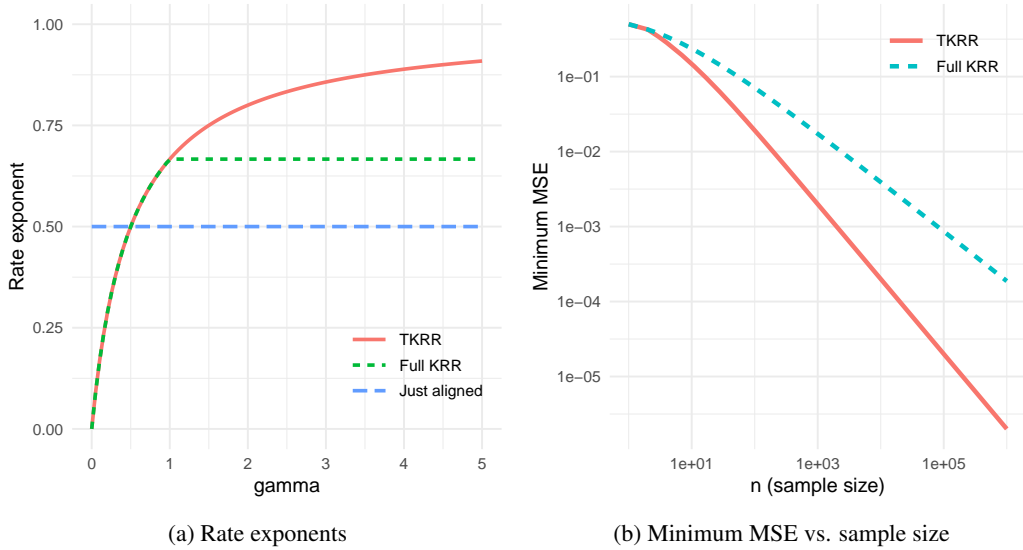

Figure 4: (a) The rate exponent function  $s(\gamma)$  for the TKRR, Eq. (17), compared with that of full KRR  $s(\delta) = s(1 \wedge \gamma)$  and the minimax exponent over the RKHS ball  $s(1/2)$ . (b) The minimum achievable MSE by TKRR and full KRR, as a function of the sample size, when  $\alpha = 1$  and  $\gamma = 10$ .

## C Additional simulations

**Multiple-descent and phase transition** We study the behavior of the  $\lambda$ -regularization curves for different values of the truncation parameter  $r$  given a fixed noise level  $\sigma$ . The panel plot and corresponding contour plot are shown in Figure 3a and 3b, respectively. The plots show multiple-descent and phase transition as demonstrated in the  $\lambda$ -regularization curves for different values of the noise level and  $r$ -regularization curves shown in Section 5.

**Rate of TKRR vs. KRR** We perform some experiments to corroborate the results of Theorem 2. We let the eigenvalues and TA scores decay polynomially with rates specified as in (13), and take the truncation parameter  $r$  to be as derived in Theorem 2(a). For the full KRR and TKRR, we calculate the respective minimum value of MSE among 1000 values of the regularization parameter  $\lambda$ , evenly

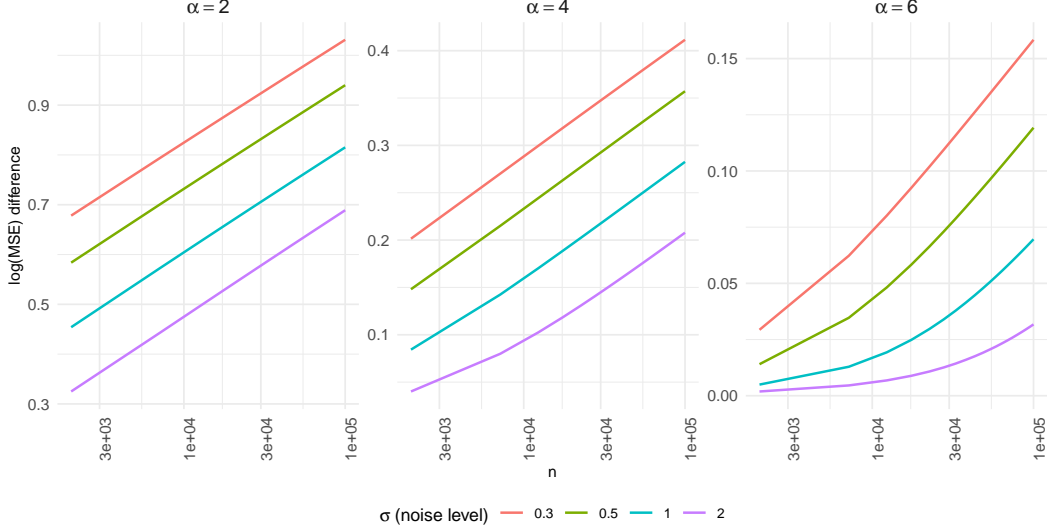

Figure 5: The difference of  $\log(\text{MSE})$  between the full KRR and TKRR versus the sample size  $n$  for  $\gamma = 5$ , and various values of  $\alpha$  and the noise level  $\sigma$ .

distributed between  $10^{-10}$  and  $10^2$ . Figure 4(b) shows the MSE for the two methods, when  $\alpha = 1$  and  $\gamma = 10$ , as a function of the sample size, on a log-log scale. The difference in slope clearly shows the difference in rate between the two approaches.

The plots in Figure 5 show the difference in minimum  $\log(\text{MSE})$  between the full KRR and TKRR versus the sample size (on the log-scale), for different combinations of decay rate  $\alpha$  and the noise level  $\sigma$ . For all the plots, we have  $\gamma = 5$ . According to Theorem 2, for sufficiently large  $n$ , the difference in minimum  $\log(\text{MSE})$  between the full KRR and TKRR should follow a line with positive slope when plotted as a function of  $\log n$ . This is clearly shown in Figure 5, where the positivity of the slope signifies the difference in rates between the two methods.

## D RKHS background

Assume that  $\mathcal{X}$  is a measurable space with a  $\sigma$ -finite measure  $\mu$  and  $\mathbb{H}$  is a separable RKHS over  $\mathcal{X}$  with a measurable kernel  $\mathbb{K} : \mathcal{X} \times \mathcal{X} \rightarrow \mathbb{R}$ . We write  $L^2 := L^2(\mu)$  for the  $L^2$  space of functions from  $\mathcal{X}$  to  $\mathbb{R}$ . For simplicity, we write  $\|\mathbb{K}\|_{L^2}$  for the  $L^2$  norm of the function  $x \mapsto \sqrt{\mathbb{K}(x, x)}$ . We assume

$$\|\mathbb{K}\|_{L^2} < \infty. \quad (25)$$

Then  $\mathbb{H}$  is a subset of  $L^2$  and the inclusion map  $J : \mathbb{H} \rightarrow L^2$  is continuous. The adjoint of this map  $J^* : L^2 \rightarrow \mathbb{H}$  is the following integral operator

$$J^* f(x) = \int \mathbb{K}(\cdot, x) f d\mu = \langle \mathbb{K}(\cdot, x), f \rangle_{L^2} \quad f \in L^2.$$

Let  $T = JJ^* : L^2 \rightarrow L^2$ . This can be thought of as the same integral operator acting on  $L^2$  with output in  $L^2$ . The decomposition  $T = JJ^*$  shows that  $T$  is self-adjoint and positive. Condition (25) implies that  $T$  is a Hilbert-Schmidt, and hence a compact, operator.

The spectral theorem for self-adjoint compact operators on  $L^2$  implies that

$$Tf = \sum_{i \in I} \lambda_i e_i \langle f, e_i \rangle_{L^2} \quad \text{for all } f \in L^2$$

where  $\{\lambda_i\}_{i \in I}$  are the non-zero eigenvalues of  $T$  ordered in decreasing fashion and  $\{e_i\}_{i \in I} \subset L^2$  a corresponding sequence of eigenvectors (at most countable), forming an orthonormal system (ONS) in  $L^2$ . That is,  $Te_i = \lambda_i e_i$  and  $\langle e_i, e_j \rangle_{L^2} = 1\{i = j\}$ .

One can also view  $\{e_i\}$  as functions in  $\mathbb{H}$ , and it is not hard to see that  $\{e_i\}_{i \in I}$  is an orthogonal sequence in  $\mathbb{H}$  with  $\|e_i\|_{\mathbb{H}}^2 = 1/\lambda_i$ . That is,  $\langle e_i, e_j \rangle_{\mathbb{H}} = 1\{i = j\}/\lambda_i$ . In other words,  $\{\sqrt{\lambda_i}e_i\}_{i \in I}$  is an ONS in  $\mathbb{H}$ .

Assume from now on that we are dealing with a Mercer kernel  $\mathbb{K}$ , that is,  $\mathcal{X}$  is a compact space and  $\mathbb{K}$  is a continuous function. Then, we have the Mercer decomposition of the kernel function

$$K(x, y) = \sum_i \lambda_i e_i(x) e_i(y), \quad \forall x, y \in \mathcal{X} \quad (26)$$

where the convergence is uniform and absolute. It then follows that  $\{\sqrt{\lambda_i}e_i\}$  is an orthonormal basis (ONB) of  $\mathbb{H}$  and we have

$$\mathbb{H} = \left\{ \sum_i \alpha_i e_i \mid \sum_i \frac{\alpha_i^2}{\lambda_i} < \infty \right\}.$$

The treatment up to this point follows more or less the treatment in [23, Chapter 4].

From now on, we patch the sequence  $\{e_i\}_{i \in I}$  to a complete orthonormal basis for the entire  $L^2$  namely  $\{e_i\}_{i \in I'}$  where  $I'$  is a proper subset of  $I$ . Let  $I_0 := I' \setminus I$ . Then,  $e_i, i \in I_0$  span the orthogonal complement of the image of  $T$  (i.e., the null space of  $T$ ). We let  $\lambda_i = 0$  for  $i \in I_0$ , so that

$$Tf = \sum_{i \in I'} \lambda_i e_i \langle f, e_i \rangle_{L^2} \quad \text{for all } f \in L^2$$

still holds. The statement  $\|e_i\|_{\mathbb{H}}^2 = \frac{1}{\lambda_i}$  also hold over  $i \in I'$ , interpreting  $1/0$  as  $\infty$ . That is,  $\|e_i\|_{\mathbb{H}} = \infty$  when  $i \in I_0$ , consistent with the fact that such  $e_i$  are not in  $\mathbb{H}$  (or more precisely do not have a version that is in  $\mathbb{H}$ ).

### D.1 Target alignment

With this notation, every function in  $L^2$  has a decomposition of the form  $f = \sum_{i \in I'} \alpha_i e_i$  where  $\alpha_i = \langle f, e_i \rangle_{L^2}$ . Then, the RKHS  $\mathbb{H}$  consists of those  $f$  for which

$$\|f\|_{\mathbb{H}}^2 = \sum_{i \in I'} \frac{\alpha_i^2}{\lambda_i} < \infty. \quad (27)$$

One can think of either  $\{\alpha_i\}_{i \in I}$  or  $\{\alpha_i\}_{i \in I'}$  as the population level kernel alignment spectrum (that is, the population counterpart of Definition 1). Note that if  $\alpha_i$  is nonzero for any  $i \in I_0$ , then  $\|f\|_{\mathbb{H}} = \infty$  and that  $f$  is not in  $\mathbb{H}$ . Even if  $\alpha_i = 0$  for all  $i \in I_0$ ,  $\{\alpha_i\}_{i \in I}$  needs to decay as imposed in (27) for the function to belong to the RKHS. For example, a necessary condition is  $\alpha_i = o(\sqrt{\lambda_i})$  for  $i \in I_0$ . In other words, belonging to the RKHS itself implies some amount of alignment between the target and the kernel (i.e. some level of decay for  $\{\alpha_i\}$ ).

To summarize, we can write

$$\mathbb{H} = \left\{ f \in L^2 \mid \sum_{i \in I'} \frac{\langle f, e_i \rangle_{L^2}^2}{\lambda_i} < \infty \right\}.$$

Let us connect to the setup of [9] and [12]. In short, these two papers impose the following condition

$$f = \sum_{i \in I'} \alpha_i e_i, \quad \sum_{i \in I'} \frac{\alpha_i^2}{\lambda_i^c} < \infty \quad (28)$$

for some  $c \in [1, 2]$ . If  $c = 1$  this just means that  $f \in \mathbb{H}$ . If  $c > 1$  it means that it is in a proper subset of  $\mathbb{H}$ . The  $c$  here is the same as the  $c$  in [9] and we have  $c = 2r$  for parameter  $r$  used in [12]. In our notation in this paper,  $c = 2\gamma$ . (Note that in our paper,  $r$  is reserved to the spectral truncation level and is a different parameter.)

In addition [9] assumes  $\lambda_i \asymp i^{-b}$  which is the same as the condition in [12], that is,  $\lambda_i \asymp i^{-\alpha}$ , for  $\alpha = b$ . Here, our notation matches that of [12]; see (13) which is the empirical counterpart of  $\lambda_i \asymp i^{-\alpha}$ . Also, [9] consider the case where  $\lambda_i$  drop to zero exactly after some point (finite RKHS) which they refer to as the case  $b = \infty$ .

## D.2 Details of matching the setups

The conditions [9, 12] are not stated as cleanly as (28). Let us see how they can be reformulated in this equivalent fashion. The paper [9] which seems to be the origin of this condition works in the abstract setting of vector-valued RKHSs. We adapt the notation to the scalar-valued RKHSs. They work with operator  $K_x : \mathbb{R} \rightarrow \mathbb{H}$  whose adjoint  $K_x^* : \mathbb{H} \rightarrow \mathbb{R}$  is given by  $K_x^* f = f(x)$  for every  $f \in \mathbb{H}$ . We then have  $aK_x^* f = \langle K_x a, f \rangle_{\mathbb{H}}$  for any  $a \in \mathbb{R}$  by the definition of an adjoint operator. Since  $aK_x^* f = af(x) = \langle a\mathbb{K}(\cdot, x), f \rangle_{\mathbb{H}}$ , it follows that

$$K_x a = a\mathbb{K}(\cdot, x), \quad a \in \mathbb{R}.$$

Then, they define the operator  $T_x := K_x K_x^* : \mathbb{H} \rightarrow \mathbb{H}$  and  $T = \int_{\mathcal{X}} T_x d\mu(x)$ . We have

$$\begin{aligned} \langle e_i, T_x e_j \rangle_{L^2} &= \langle e_i, K_x K_x^* e_j \rangle_{L^2} = \langle e_i, K_x e_j(x) \rangle_{L^2} \\ &= \langle e_i, e_j(x) K(\cdot, x) \rangle_{L^2} \\ &= e_j(x) \langle e_i, K(\cdot, x) \rangle_{L^2} = e_j(x) \lambda_i e_i(x) \end{aligned}$$

where the last step is since  $e_i$  is an eigenvector of the integral operator  $f \mapsto (x \mapsto \langle f, K(\cdot, x) \rangle_{L^2})$  from  $L^2$  to  $L^2$ , and that the range of this operator is in fact in  $\mathbb{H}$  (so evaluations make sense). This also follows from the Mercer decomposition. It then follows that

$$\langle e_i, T e_j \rangle_{L^2} = \int \langle e_i, T_x e_j \rangle_{L^2} d\mu(x) = \lambda_i \int e_i(x) e_j(x) d\mu(x) = \lambda_i \langle e_i, e_j \rangle_{L^2} = \lambda_i 1\{i = j\}.$$

That is  $T$  can be viewed as a diagonal matrix  $T = \text{diag}(\lambda_i, i \in I')$  in the basis  $\{e_i\}_{i \in I'}$ .

The condition in [9] is  $f = T^{(c-1)/2} g$  where  $g \in \mathbb{H}$  (or more precisely  $\|g\|_{\mathbb{H}}^2 \leq R$ ). Let us write  $g = \sum_{i \in I'} \beta_i e_i$  and  $f = \sum_{i \in I'} \alpha_i e_i$ . Since  $T^{(c-1)/2}$  is a diagonal matrix in this basis, we have  $\alpha_i = \lambda_i^{(c-1)/2} \beta_i$  or equivalently  $\beta_i = \lambda_i^{(1-c)/2} \alpha_i$ . Then,  $g \in \mathbb{H}$  iff  $\sum_i \beta_i^2 / \lambda_i < \infty$  which is equivalent to

$$\sum_i \frac{1}{\lambda_i} (\lambda_i^{(1-c)/2})^2 \alpha_i^2 < \infty \iff \sum_i \frac{\alpha_i^2}{\lambda_i^c} < \infty$$

and this is the desired condition.

Now to see that the condition in [12] is the same with  $2r = c$ , note that they require  $\|\Sigma^{1/2-r} \theta^*\|_{\mathbb{H}} < \infty$  in their equation (7) which is a typo and is meant to be  $\|\Sigma^{1/2-r} \theta^*\|_{\ell^2} < \infty$  in the  $\ell^2$  sequence norm. Here  $\Sigma = \text{diag}(\lambda_i)$  in our notation.

As for  $\theta^* = (\theta_i^*)$  which is a sequence in  $\ell^2$ , it is defined by the expansion  $f^* = \sum_i \theta_i^* \psi_i$  where  $\psi_i = \sqrt{\lambda_i} e_i$  in our notation. Thus, if we let  $f = \sum_i \alpha_i e_i$ , then  $\alpha_i = \sqrt{\lambda_i} \theta_i^*$ . So the condition imposed in [12] is

$$\sum_i (\lambda_i^{1/2-r} \theta_i^*)^2 < \infty \iff \sum_i (\lambda_i^{1/2-r} \lambda_i^{-1/2} \alpha_i)^2 < \infty \iff \sum_i \lambda_i^{-2r} \alpha_i^2 < \infty$$

which is the desired condition with  $c = 2r$ .

Immediately after stating this condition in [12], it is abandoned in favor of the condition  $\lambda_i^{-2r} \alpha_i^2 \asymp i^{-1}$  which gives, together with  $\lambda_i \asymp i^{-b}$

$$\alpha_i \asymp i^{-1/2} \lambda_i^r \asymp i^{-\frac{1+2rb}{2}}.$$

or equivalently  $\theta_i^* \asymp \lambda_i^{-1/2} \alpha_i \asymp O(i^{-\frac{1+b(2r-1)}{2}})$ . This is condition (8) in [12].

## D.3 Minimax rates

Theorem 1 and 2 in [9] together establish that the minimax rate for the signal model (28) when  $c \in (1, 2]$  is given by  $(1/\ell)^{bc/(bc+1)}$ , where  $\ell$  is the sample size. Moreover, the same rate is minimax for  $c = 1$  up to logarithmic factors. Translating to our notation with  $c = 2\gamma$ ,  $\ell = n$  and  $b = \alpha$ , the minimax rate in our model is  $(1/n)^{2\gamma\alpha/(2\gamma\alpha+1)}$  when  $\gamma \in (1/2, 1]$ , as claimed in Section 4.2.
